# Supplementary material for: Nucleocapsid protein of SARS-CoV-2 phase separates into RNA-rich polymerase-containing condensates
Source: PubMed Central journal article supplement (PMC7699647; doi:10.1038/s41467-020-19843-1), 2020-11-27
Supplement: 41467_2020_19843_MOESM2_ESM.pdf [file 41467_2020_19843_MOESM2_ESM.pdf]

## Description of Additional Supplementary Files

**Supplementary Movie 1. Colocalization of N<sup>SARS-CoV-2</sup> and the stress granule marker G3BP1 in arsenite-induced stress granules in HeLa cells. Scale bar 10  $\mu$ m.**
